# Supplementary material for: Effects of preferential flow on snowmelt partitioning and groundwater recharge in frozen soils
Source: Copernicus journal article supplement (doi:10.5194/hess-23-5017-2019), 2019-12-13
Supplement: Supplementary file [file hess-23-5017-2019-supplement.pdf]

Supplement of Hydrol. Earth Syst. Sci., 23, 5017–5031, 2019  
<https://doi.org/10.5194/hess-23-5017-2019-supplement>  
© Author(s) 2019. This work is distributed under  
the Creative Commons Attribution 4.0 License.

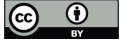

*Supplement of*

## **Effects of preferential flow on snowmelt partitioning and groundwater recharge in frozen soils**

**Aaron A. Mohammed et al.**

*Correspondence to:* Aaron A. Mohammed (amohamme@ucalgary.ca)

The copyright of individual parts of the supplement might differ from the CC BY 4.0 License.

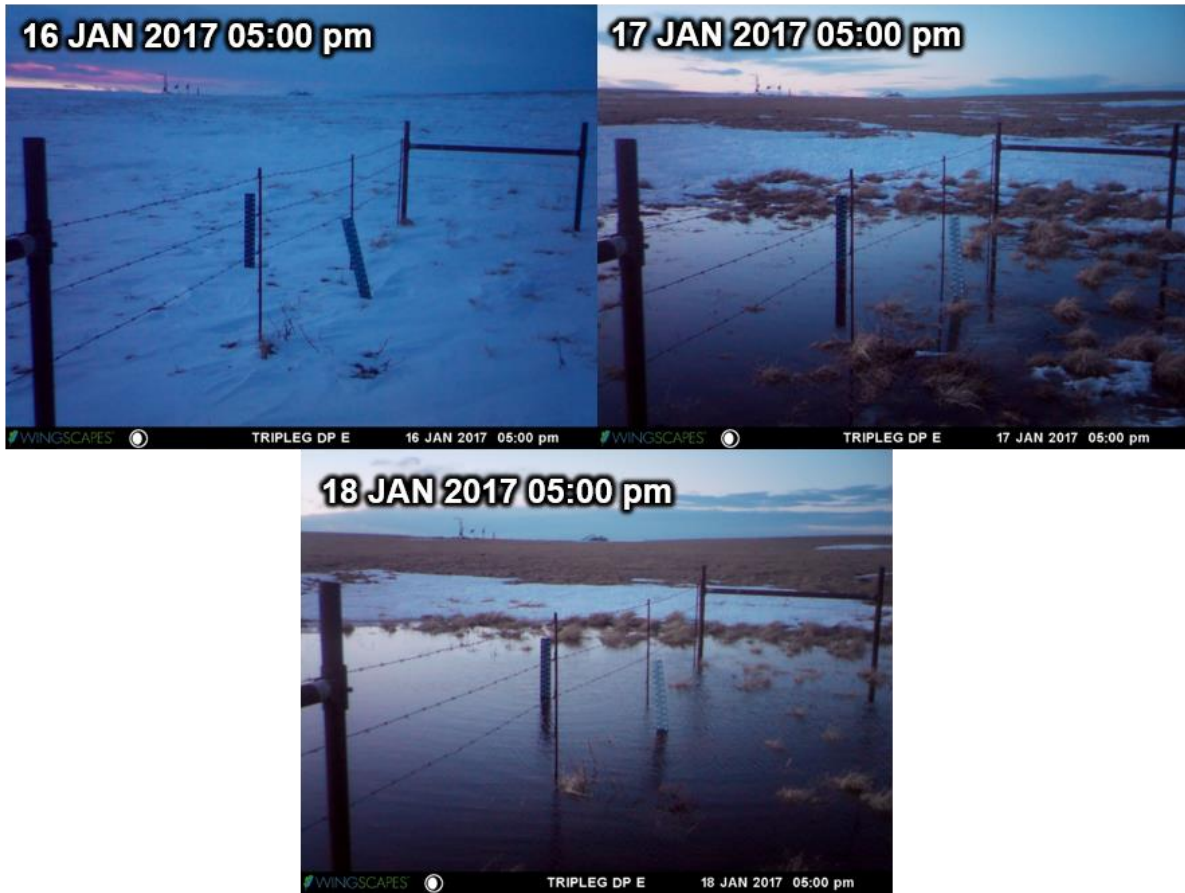

Figure S.1 – Time-lapse photos showing snowcover depletion and only lower parts of the slopes retained snow by January 17 while ponding and water inputs continued throughout January 18 despite limited amount of snow left.

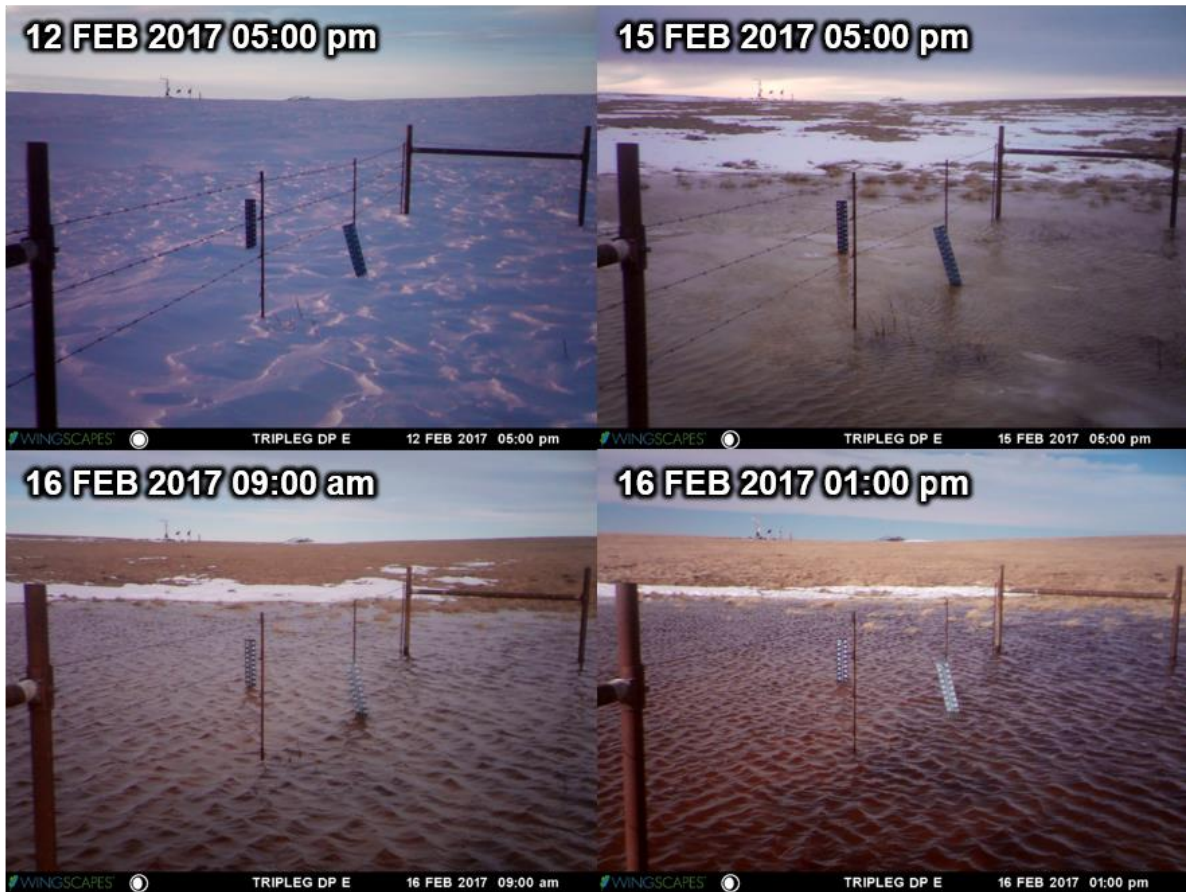

Figure S.2 – Time-lapse photos showing snowcover depletion and melt starting February 13 with snow nearly gone by morning of February 16 while pond level increases throughout the 16<sup>th</sup>.

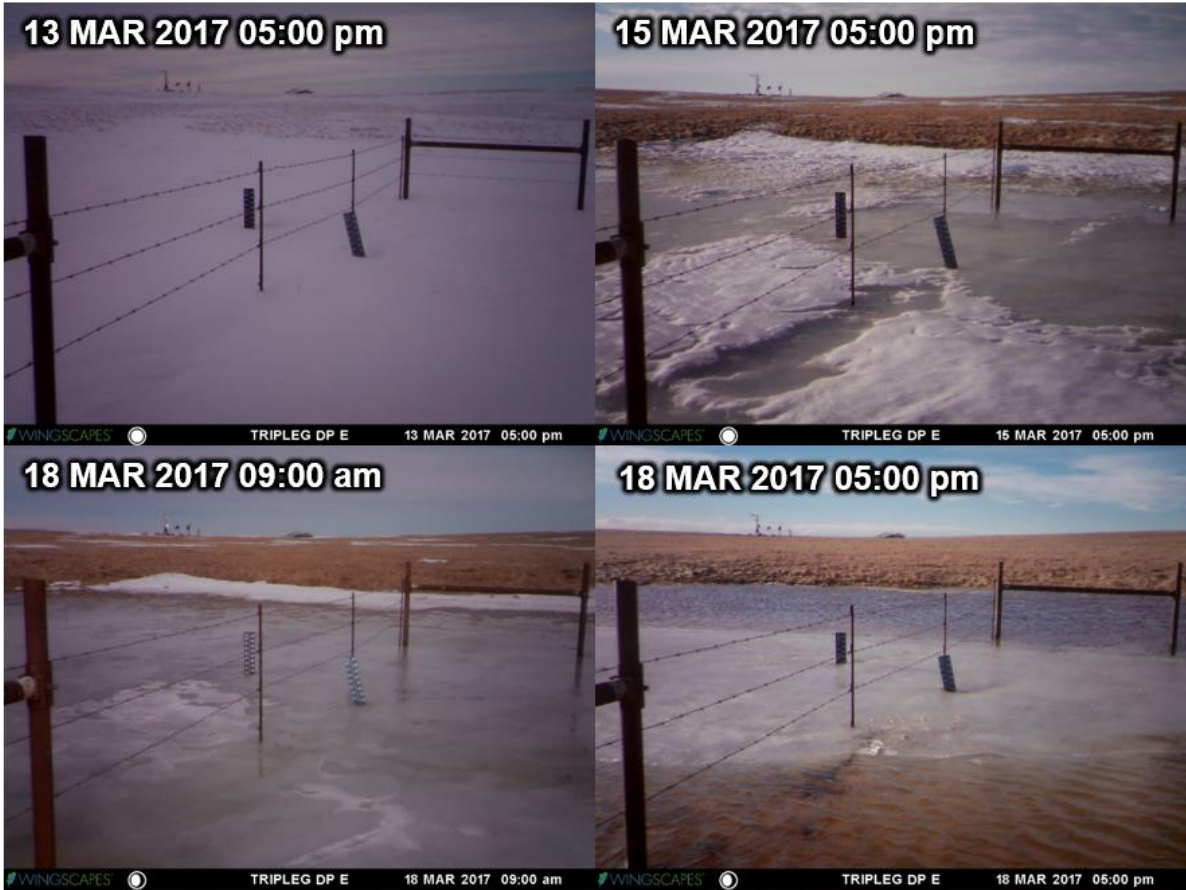

Figure S.3 – Time-lapse photos showing snowcover depletion and most of snowcover disappeared on March 14-15 while pond level increases throughout March 18 despite little snowcover left.
